# Supplementary material for: Impact of a youth-led social marketing intervention run by adolescents to encourage healthy lifestyles among younger school peers (EYTO-Kids project): a parallel-cluster randomised controlled pilot study
Source: PubMed Central journal article supplement — J Epidemiol Community Health. 2019 Jan 25;73(4):324–33. doi: 10.1136/jech-2017-210163 (PMC6581153; doi:10.1136/jech-2017-210163), 2019-01-25
Supplement: jech-2017-210163supp001.pdf [file jech-2017-210163supp001.pdf]

**Supplementary file 1: Fruit consumption and physical activity in children (principal outcomes), as analyzed as continuous variables.**

| PRINCIPAL OUTCOMES           |       | INTERVENTION GROUP (n=750) |                                      |                      | CONTROL GROUP (n=654)     |                                      |                      | P-value control vs intervention group <sup>2</sup> |
|------------------------------|-------|----------------------------|--------------------------------------|----------------------|---------------------------|--------------------------------------|----------------------|----------------------------------------------------|
|                              |       | Baseline mean ( $\pm$ SD)  | End of intervention mean ( $\pm$ SD) | P-value <sup>1</sup> | Baseline mean ( $\pm$ SD) | End of intervention mean ( $\pm$ SD) | P-value <sup>1</sup> |                                                    |
| Physical activity hours/week | Boys  | 2.92 ( $\pm$ 1.27)         | 3.04 ( $\pm$ 1.3)                    | 0.318                | 2.96 ( $\pm$ 1.34)        | 3.26 ( $\pm$ 1.12)                   | <b>0.016</b>         | 0.641                                              |
|                              | Girls | 2.5 ( $\pm$ 1.29)          | 2.72 ( $\pm$ 1.24)                   | 0.106                | 2.82 ( $\pm$ 1.28)        | 2.78 ( $\pm$ 1.21)                   | 0.777                | <b>0.050</b>                                       |
|                              | Total | 2.73 ( $\pm$ 1.29)         | 2.89 ( $\pm$ 1.28)                   | 0.069                | 2.88 ( $\pm$ 1.31)        | 3.01 ( $\pm$ 1.19)                   | 0.167                | 0.282                                              |
| Fruit portions/day           | Boys  | 1.18 ( $\pm$ 0.74)         | 1.3 ( $\pm$ 0.7)                     | 0.054                | 1.15 ( $\pm$ 0.71)        | 1.18 ( $\pm$ 0.77)                   | 0.642                | 0.657                                              |
|                              | Girls | 1.19 ( $\pm$ 0.73)         | 1.3 ( $\pm$ 0.73)                    | 0.131                | 1.16 ( $\pm$ 0.7)         | 1.15 ( $\pm$ 0.7)                    | 0.885                | 0.554                                              |
|                              | Total | 1.18 ( $\pm$ 0.74)         | 1.3 ( $\pm$ 0.71)                    | <b>0.015</b>         | 1.15 ( $\pm$ 0.71)        | 1.16 ( $\pm$ 0.74)                   | 0.842                | 0.371                                              |

#  $\pm$ SD: Standard Deviation

<sup>1</sup> Mixed Models of Repeated Measures

<sup>2</sup> GLMs

\*<0.05 Bold
