# Supplementary material for: Impact of a youth-led social marketing intervention run by adolescents to encourage healthy lifestyles among younger school peers (EYTO-Kids project): a parallel-cluster randomised controlled pilot study
Source: PubMed Central journal article supplement — J Epidemiol Community Health. 2019 Jan 25;73(4):324–33. doi: 10.1136/jech-2017-210163 (PMC6581153; doi:10.1136/jech-2017-210163), 2019-01-25
Supplement: jech-2017-210163supp002.pdf [file jech-2017-210163supp002.pdf]

**Supplementary file 2. Additional analysis of lifestyles of children and adolescents in the intervention and control groups (comparison of baseline to the end of the study)**

|                                                                  |       | Baseline<br>% (n)                 | End of<br>intervention<br>% (n) | *p-value     | Baseline<br>% (n)            | End of<br>intervention<br>% (n) | *p-value         | **p-value<br>intervention<br>vs control<br>group |
|------------------------------------------------------------------|-------|-----------------------------------|---------------------------------|--------------|------------------------------|---------------------------------|------------------|--------------------------------------------------|
| <i>Children</i>                                                  |       | <i>Intervention group (n=375)</i> |                                 |              | <i>Control group (n=327)</i> |                                 |                  |                                                  |
| Never commercial<br>juice consumption                            | Boys  | 30.0 (62)                         | 44.3 (91)                       | <b>0.003</b> | 42.3 (66)                    | 49.1 (77)                       | 0.241            | 0.590                                            |
|                                                                  | Girls | 44.6 (76)                         | 57.8 (98)                       | <b>0.003</b> | 49.5 (85)                    | 59.7 (102)                      | 0.064            | 0.364                                            |
|                                                                  | Total | 36.6 (138)                        | 50.4 (189)                      | <b>0.026</b> | 46.1 (151)                   | 54.7 (179)                      | <b>&lt;0.001</b> | 0.671                                            |
| Never soft drink<br>consumption (soda,<br>etc.)                  | Boys  | 56.6 (116)                        | 54.4 (112)                      | 0.684        | 63.8 (100)                   | 64.1 (100)                      | 0.822            | 0.612                                            |
|                                                                  | Girls | 61.1 (104)                        | 66.2 (113)                      | 0.327        | 71.4 (122)                   | 62.0 (106)                      | 0.053            | <b>0.044</b>                                     |
|                                                                  | Total | 58.6 (120)                        | 59.8<br>(226+5)                 | 0.710        | 67.8 (222)                   | 63.0 (206)                      | 0.205            | 0.261                                            |
| Never sweetened<br>and carbonated<br>drink consumption<br>(coke) | Boys  | 59.6 (122)                        | 58.5 (120)                      | 0.771        | 74.2 (116)                   | 64.7 (101)                      | 0.081            | 0.098                                            |
|                                                                  | Girls | 68.8 (117)                        | 64.4 (110)                      | 0.438        | 74.4 (127)                   | 68.0 (116)                      | 0.211            | 0.542                                            |
|                                                                  | Total | 63.8 (239)                        | 61.2 (230)                      | 0.481        | 74.3 (243)                   | 66.4 (217)                      | 0.031            | 0.111                                            |
| Never gummy and<br>sweet<br>consumption/week                     | Boys  | 75.1 (154)                        | 83.0 (170)                      | <b>0.048</b> | 88.4 (138)                   | 89.8 (140)                      | 0.716            | 0.055                                            |
|                                                                  | Girls | 85 (145)                          | 92.1 (156)                      | 0.075        | 91.0 (156)                   | 89.7 (153)                      | 0.736            | <b>0.038</b>                                     |
|                                                                  | Total | 79.6 (299)                        | 87.1 (326)                      | <b>0.006</b> | 89.8 (294)                   | 89.7 (193)                      | 0.782            | <b>0.004</b>                                     |
| <i>Adolescents</i>                                               |       | <i>Intervention group (n=94)</i>  |                                 |              | <i>Control group (n=98)</i>  |                                 |                  |                                                  |
| Never commercial<br>juice consumption                            | Boys  | 37.9 (14)                         | 47.4 (18)                       | 0.515        | 53.3 (24)                    | 40.1 (18)                       | 0.191            | 0.111                                            |
|                                                                  | Girls | 54.2 (33)                         | 64.8 (39)                       | 0.251        | 46.9 (23)                    | 53.1 (26)                       | 0.581            | 0.548                                            |
|                                                                  | Total | 47.9 (47)                         | 58.0 (57)                       | 0.142        | 50.0 (47)                    | 46.9 (44)                       | 0.713            | 0.124                                            |
| Never soft drink<br>consumption (soda,<br>etc.)                  | Boys  | 47.5 (18)                         | 48.3 (18)                       | 0.877        | 51.1 (23)                    | 45.0 (20)                       | 0.685            | 0.624                                            |
|                                                                  | Girls | 55.0 (33)                         | 51.2 (31)                       | 0.748        | 54.2 (27)                    | 61.2 (30)                       | 0.715            | 0.451                                            |
|                                                                  | Total | 52.1 (51)                         | 50.1 (49)                       | 0.789        | 52.7 (50)                    | 53.4 (50)                       | 0.962            | 0.678                                            |
| Never sweetened<br>and carbonated<br>drink consumption<br>(cola) | Boys  | 44.7 (17)                         | 47.4 (18)                       | 0.792        | 73.3 (33)                    | 59.0 (27)                       | 0.104            | 0.096                                            |
|                                                                  | Girls | 61.3 (37)                         | 48.3 (29)                       | 0.141        | 63.3 (31)                    | 51.2 (30)                       | 1.000            | 0.785                                            |
|                                                                  | Total | 54.9 (54)                         | 48.0 (47)                       | 0.351        | 68.1 (64)                    | 60.2 (57)                       | 0.173            | 0.301                                            |
| Never gummy and<br>sweet<br>consumption/week                     | Boys  | 84.2 (32)                         | 91.5 (35)                       | 0.561        | 88.9 (40)                    | 88.3 (40)                       | 0.992            | 0.111                                            |
|                                                                  | Girls | 93.3 (56)                         | 91.4 (55)                       | 0.838        | 83.7 (41)                    | 89.7 (44)                       | 0.472            | 0.053                                            |
|                                                                  | Total | 89.8 (88)                         | 91.4 (90)                       | 0.774        | 86.2 (81)                    | 89.0 (84)                       | 0.627            | 0.850                                            |

\*p-value: McNemar tests (changes in each group).

\*\*p-value: Generalized linear models (differences in the changes from baseline to the end of the intervention in the intervention and control groups).

The main analysis was based on the intention-to-treat population.

<sup>a</sup>Sugary drinks takes into account three categories: commercial juice, soda and coke.
